# Supplementary material for: Inhibition of A549 Lung Cancer Cell Migration and Invasion by Ent-Caprolactin C via the Suppression of Transforming Growth Factor-β-Induced Epithelial—Mesenchymal Transition
Source: MDPI journal article supplement (doi:10.3390/md19080465), 2021-08-19

# Inhibition of A549 Lung Cancer Cell Migration and Invasion by *Ent*-Caprolactin C via the Suppression of Transforming Growth Factor- $\beta$ -Induced Epithelial–Mesenchymal Transition

So Young Kim <sup>1,†</sup>, Myoung-Sook Shin <sup>2,†</sup>, Geum Jin Kim <sup>1,3</sup>, Hyukbean Kwon <sup>1</sup>, Myong Jin Lee <sup>2</sup>, Ah-Reum Han <sup>4</sup>, Joo-Won Nam <sup>1</sup>, Chan-Hun Jung <sup>5</sup>, Ki Sung Kang <sup>2,\*</sup> and Hyukjae Choi <sup>1,3,\*</sup>

<sup>1</sup> College of Pharmacy, Yeungnam University, Gyeongsan-si, Gyeongsangbukdo 38541, Korea; sososo0305@hanmail.net (S.Y.K.); cantas87@ynu.ac.kr (G.J.K.); zero9602@gmail.com (H.K.); jwnam@yu.ac.kr (J.-W.N.)

<sup>2</sup> College of Korean Medicine, Gachon University, Seongnam 13120, Korea; ms.shin@gachon.ac.kr (M.-S.S.); myongene@naver.com (M.J.L.)

<sup>3</sup> Research Institute of Cell Culture, Yeungnam University, Gyeongsan-si, Gyeongsangbukdo 38541, Korea

<sup>4</sup> Advanced Radiation Technology Institute, Korea Atomic Energy Research Institute, Jeongeup-si, Jeollabuk-do 56212, Korea; arhan@kaeri.re.kr

<sup>5</sup> Jeonju AgroBio-Materials Institute, Jeonju-si, Jeollabuk-do 54810, Korea; biohun@gmail.com

\* Correspondence: kkang@gachon.ac.kr (K.S.K.); h5choi@yu.ac.kr (H.C.); Tel.: +82-31-750-5402 (K.S.K.); Tel.: +82-53-810-2824 (H.C.)

† These authors contributed equally to this work.

**Figure S1.** HR-EI-MS data of **1**

**Figure S2.**  $^1\text{H}$  NMR spectrum (600 MHz) of **1** in  $\text{CDCl}_3$

**Figure S3.**  $^{13}\text{C}$  NMR spectrum (150 MHz) of **1** in  $\text{CDCl}_3$

**Figure S4.** COSY spectrum of **1** in  $\text{CDCl}_3$

**Figure S5.** Phase-sensitive HSQC spectrum of **1** in  $\text{CDCl}_3$

**Figure S6.** HMBC spectrum of **1** in  $\text{CDCl}_3$

**Figure S7.** Chiral separation of synthetic compounds **1** (synthetic caprolactam 2) and **2**  
(synthetic caprolactam 1)

**Figure S8.**  $^1\text{H}$  NMR spectrum (250 MHz) of **2** (a synthetic caprolactam 1) in  $\text{CDCl}_3$

**Figure S9.**  $^{13}\text{C}$  NMR spectrum (63 MHz) of **2** in  $\text{CDCl}_3$

**Figure S10.** Comparison of  $^1\text{H}$  NMR spectra of **1** (natural), **1** (synthetic) and **2** (synthetic)

# Figure S1. HR-EI-MS data of 1

[ Elemental Composition ]

Data : EI-A407

Date : 25-Jan-2017 14:08

Page: 1

Sample: MC085-E-5

Note : -

Inlet : Direct

Ion Mode : EI+

RT : 0.99 min

Scan#: (50,51)

Elements : C 100/0, H 150/0, N 10/0, O 10/0

Mass Tolerance : 1000ppm, 3mmu if m/z < 3, 5mmu if m/z > 5

Unsaturation (U.S.) : -0.5 - 50.0

| Observed m/z | Int%  | Err [ppm / mmu] | U.S. | Composition       |
|--------------|-------|-----------------|------|-------------------|
| 212.1526     | 100.0 | -18.4 / -3.9    | 7.0  | C 16 H 20         |
|              |       | +13.2 / +2.8    | 4.0  | C 7 H 16 N 8      |
|              |       | +6.9 / +1.5     | 3.5  | C 9 H 18 N 5 O    |
|              |       | +0.6 / +0.1     | 3.0  | C 11 H 20 N 2 O 2 |

**Figure S2.**  $^1\text{H}$  NMR spectrum (600 MHz) of **1** in  $\text{CDCl}_3$

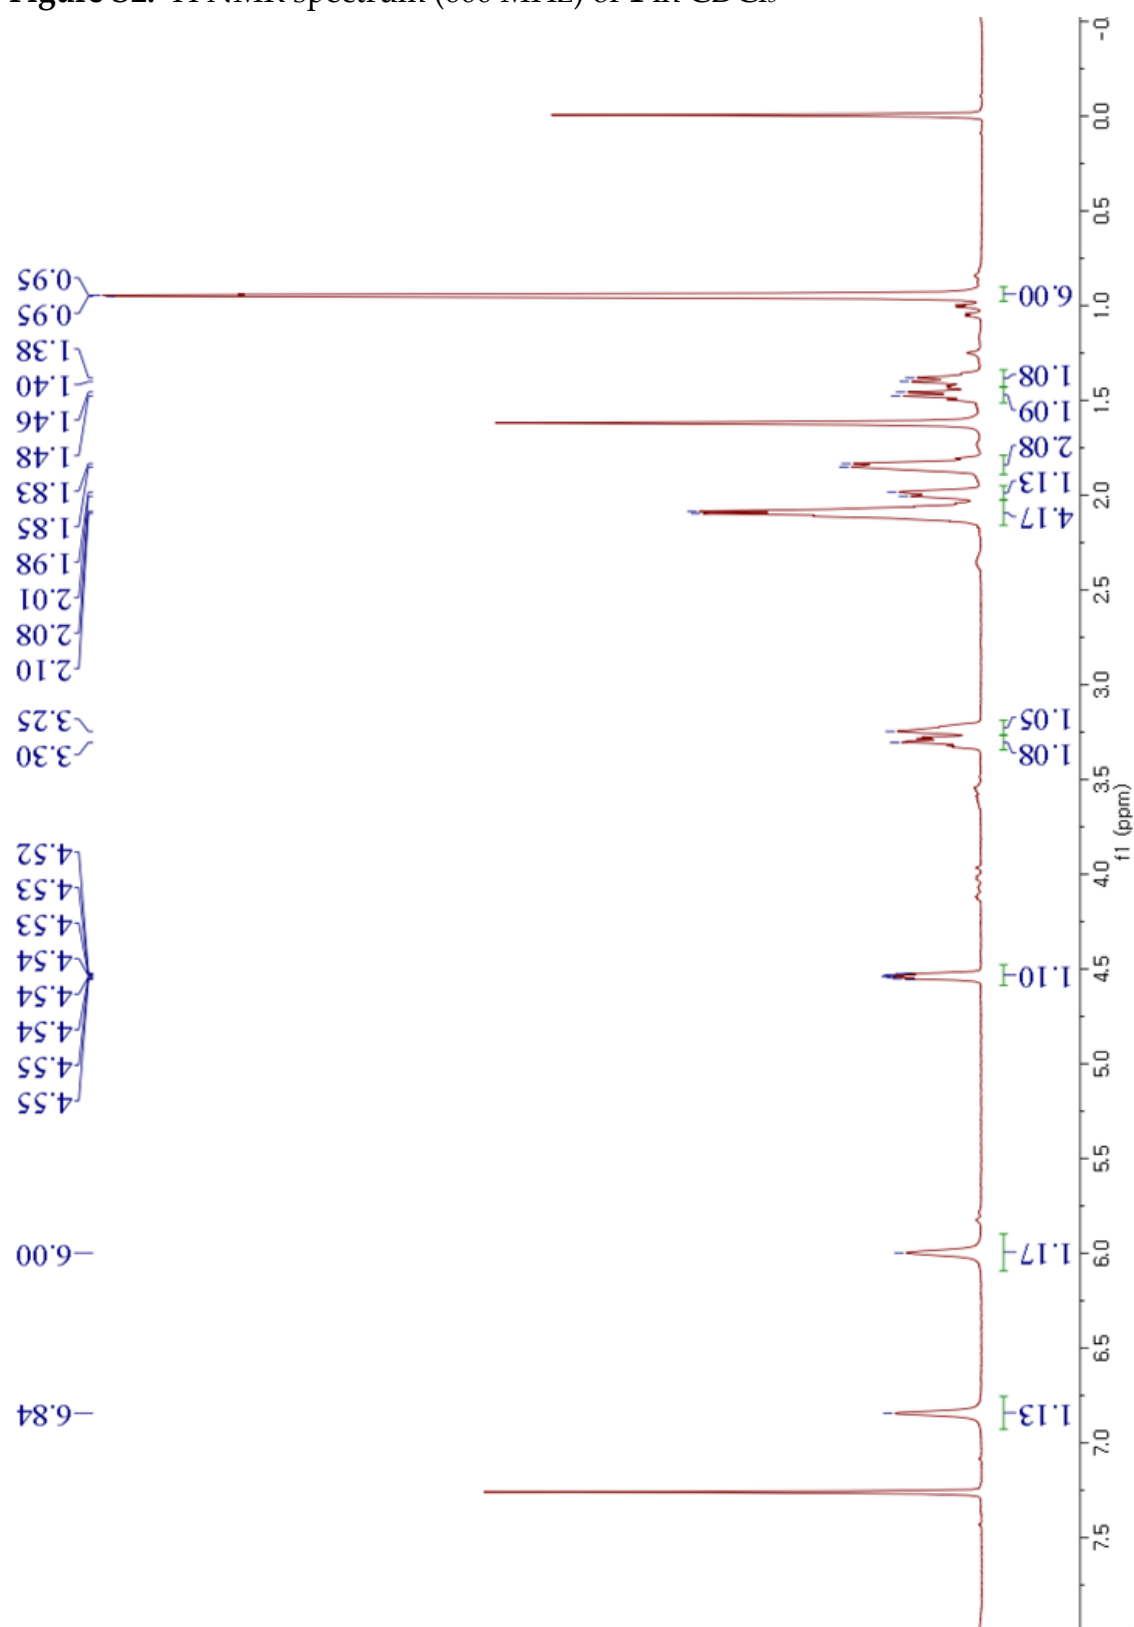

**Figure S3.**  $^{13}\text{C}$  NMR spectrum (150 MHz) of **1** in  $\text{CDCl}_3$

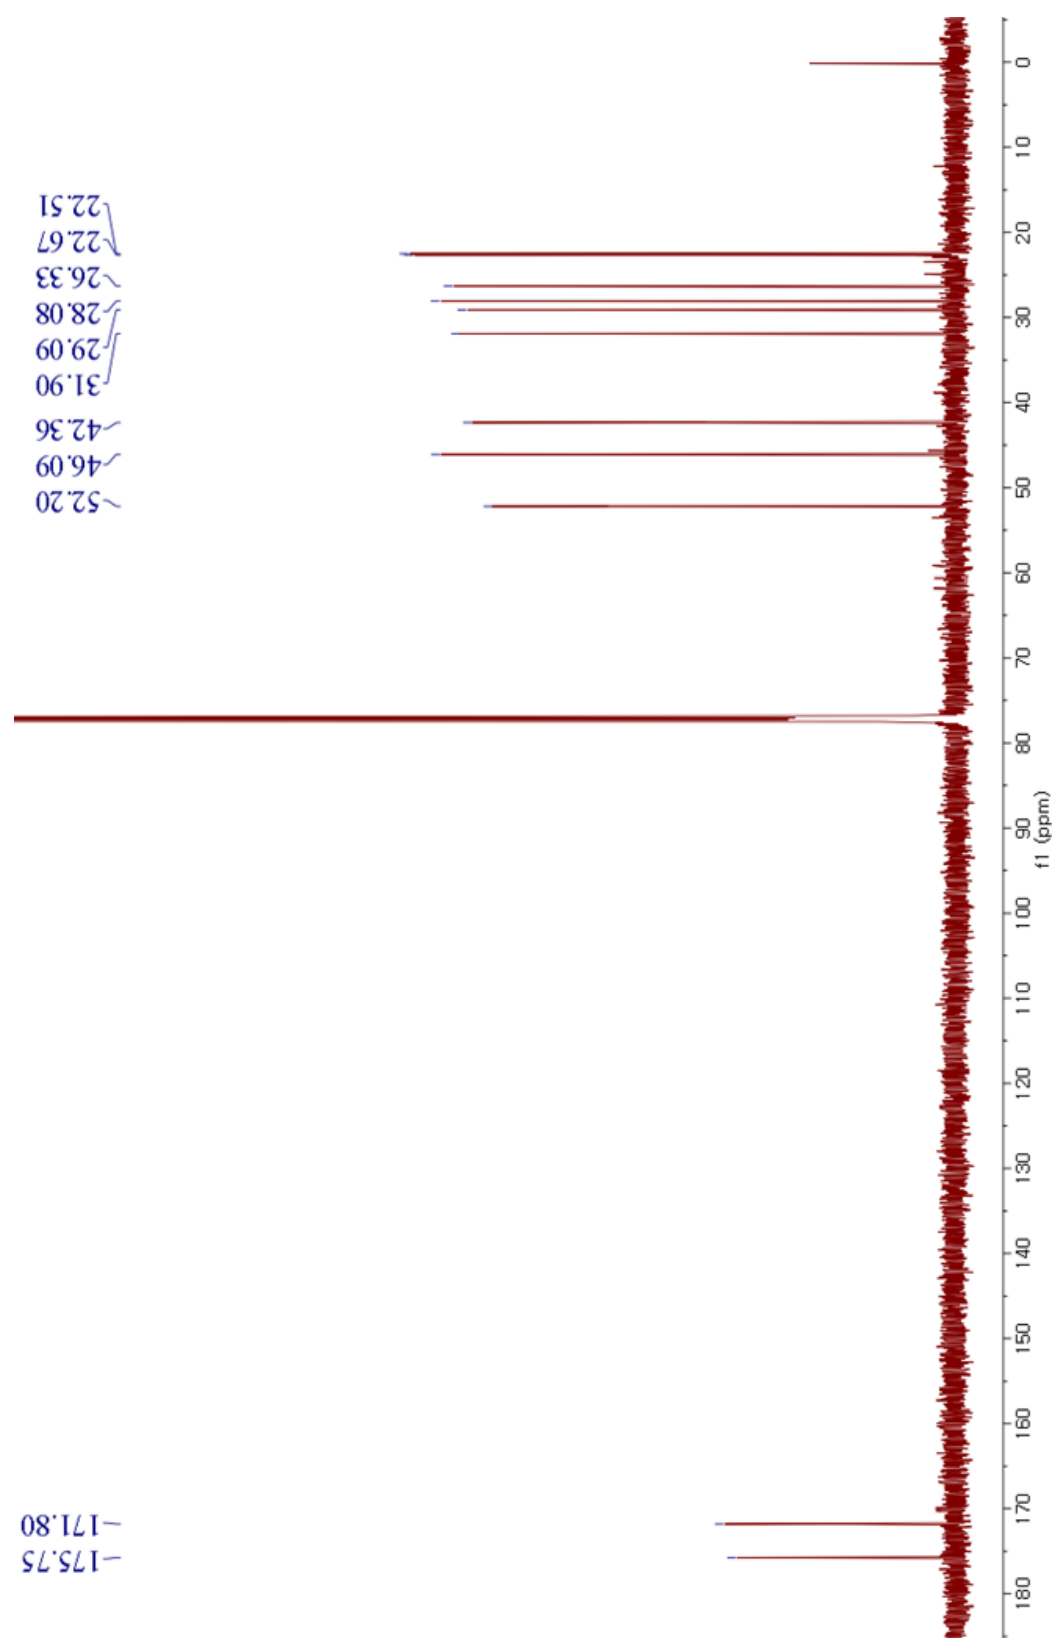

**Figure S4.** COSY spectrum of **1** in CDCl<sub>3</sub>

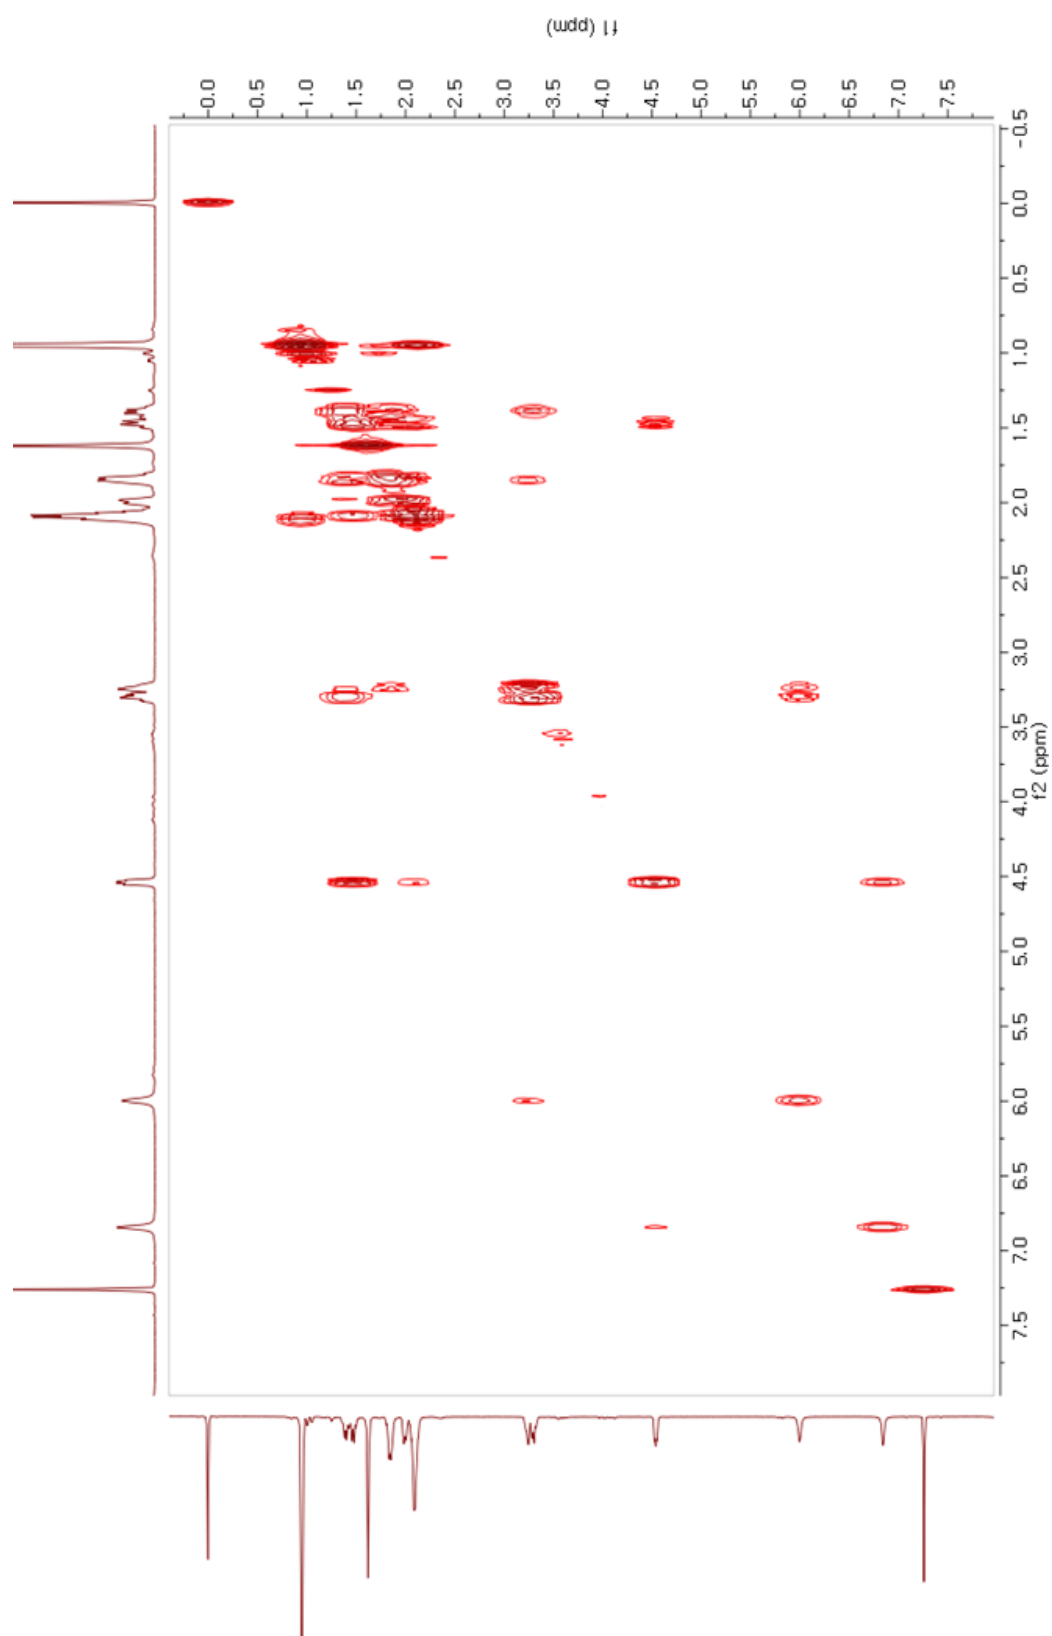

**Figure S5.** Phase-sensitive HSQC spectrum of **1** in CDCl<sub>3</sub>

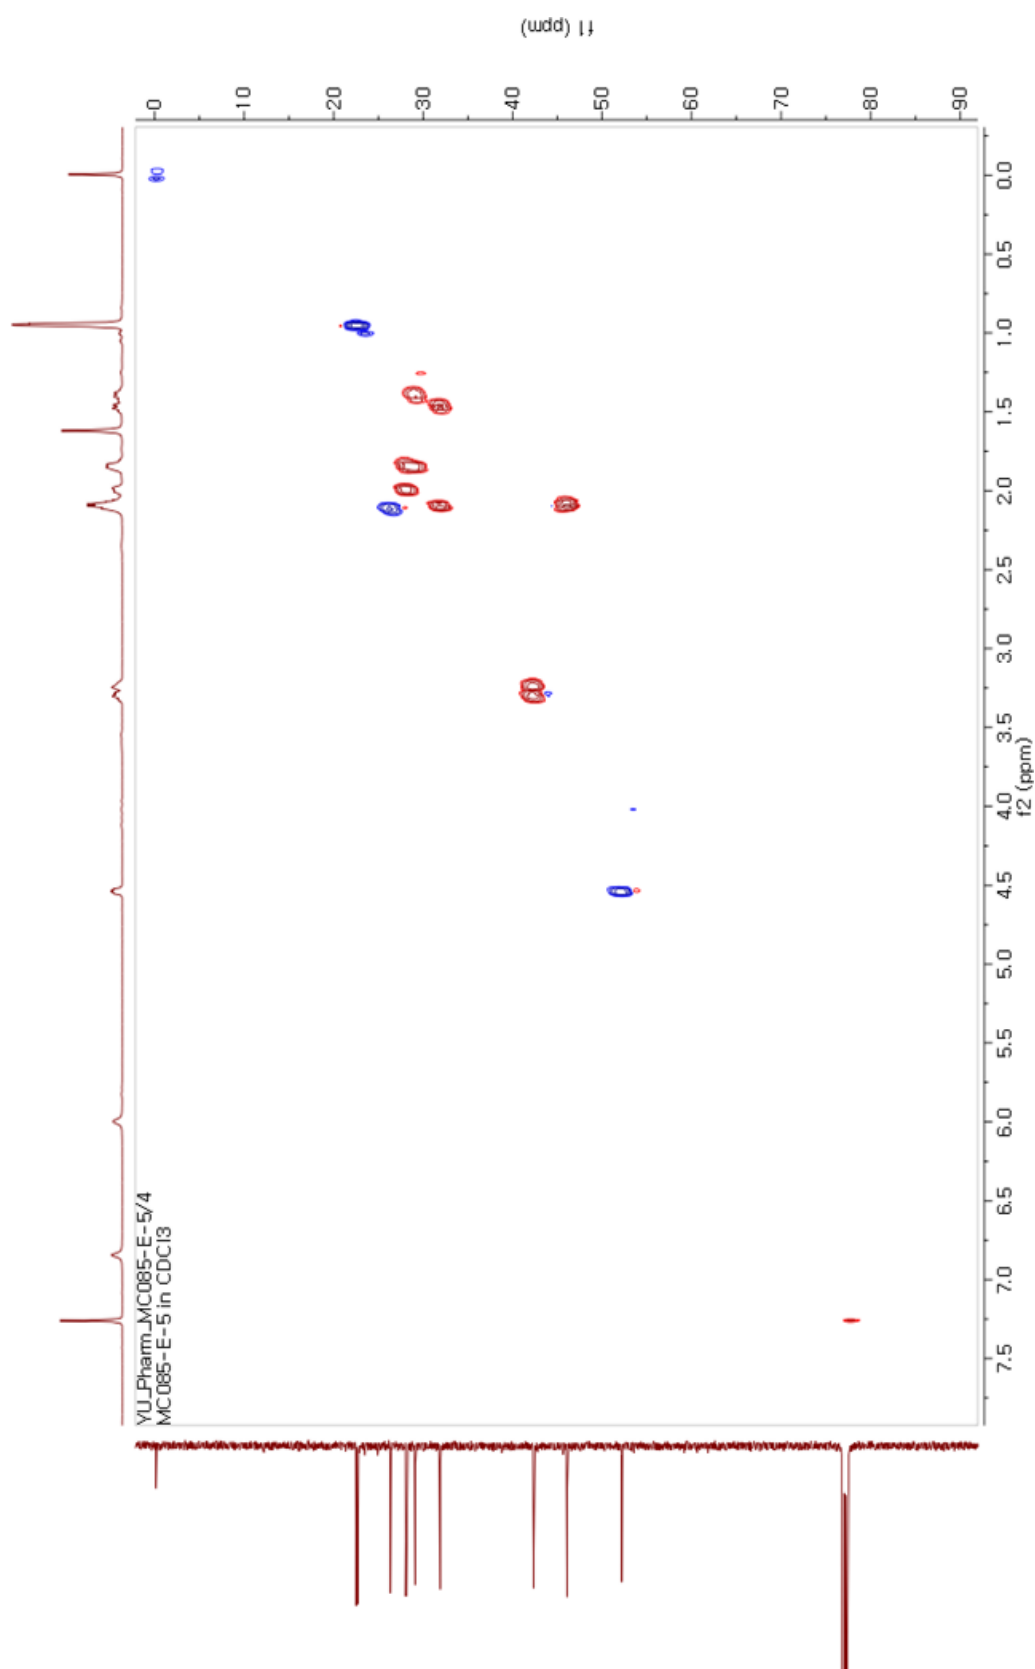

Figure S6. HMBC spectrum of **1** in CDCl<sub>3</sub>

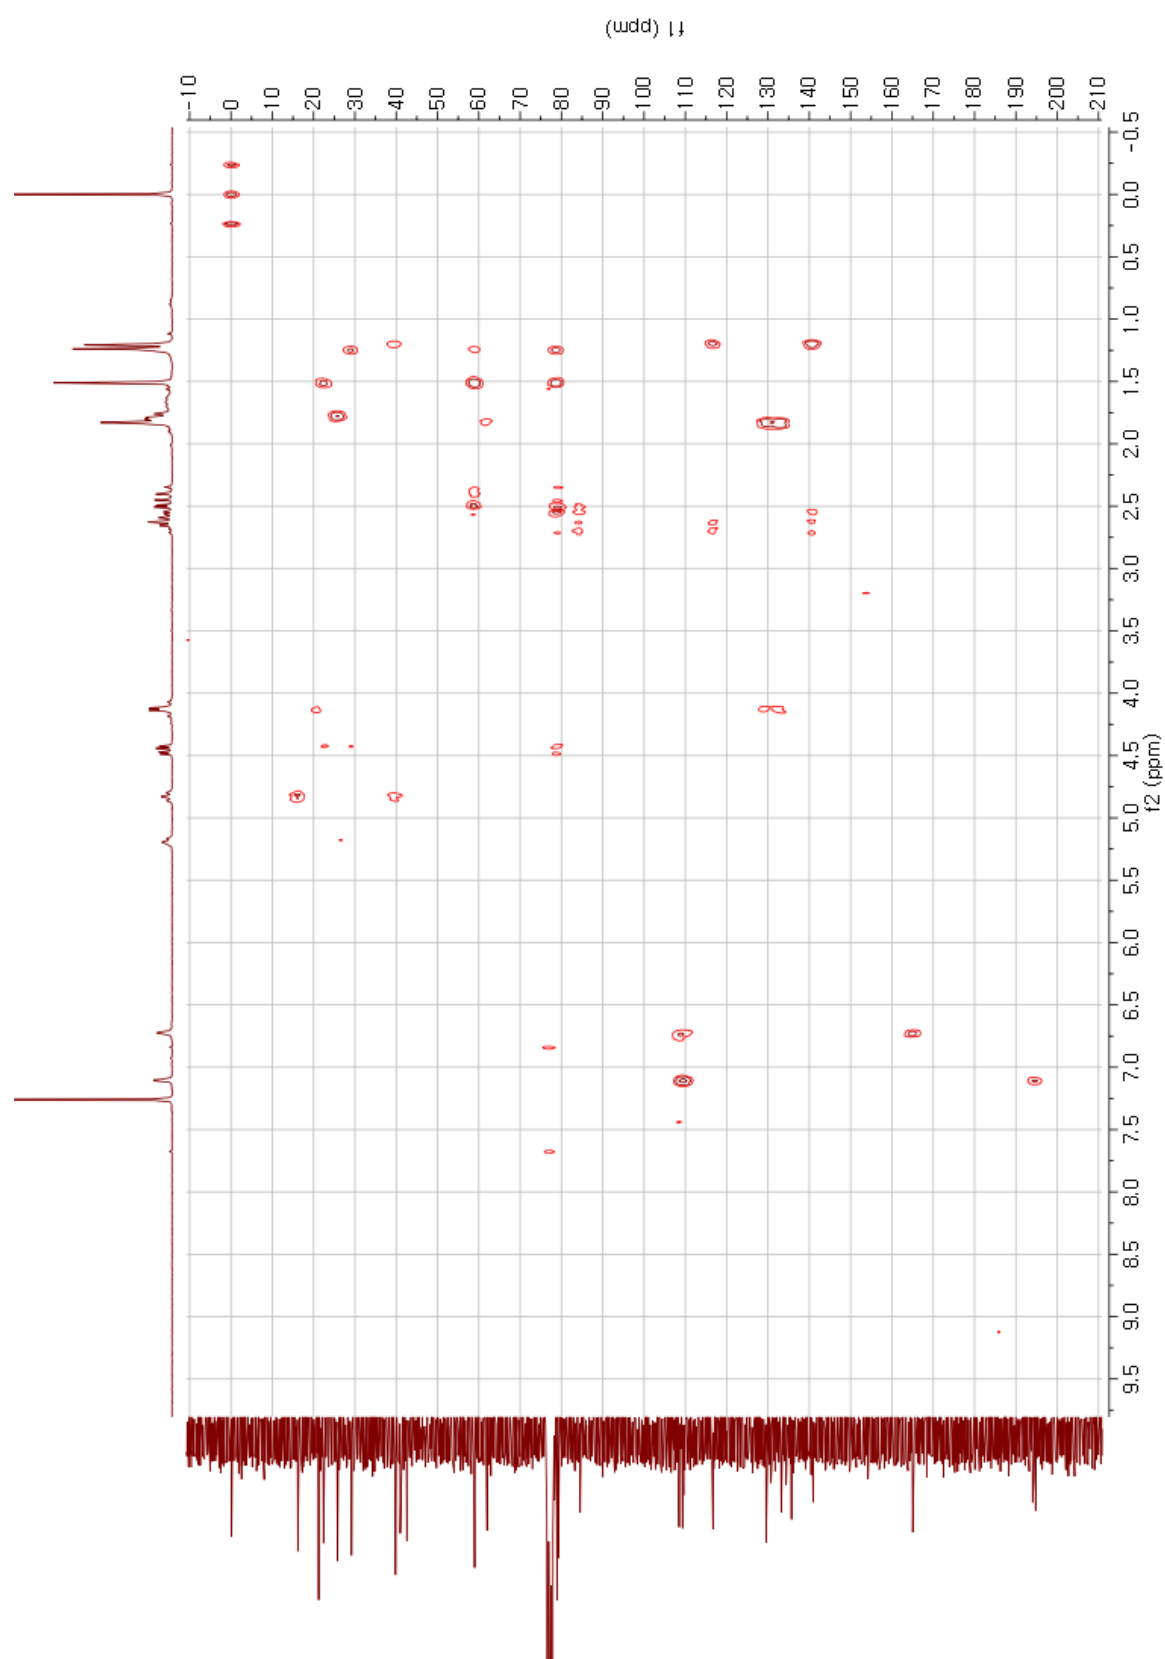

**Figure S7.** Chiral separation of synthetic compounds **1** (synthetic caprolactam 2) and **2** (synthetic caprolactam 1)

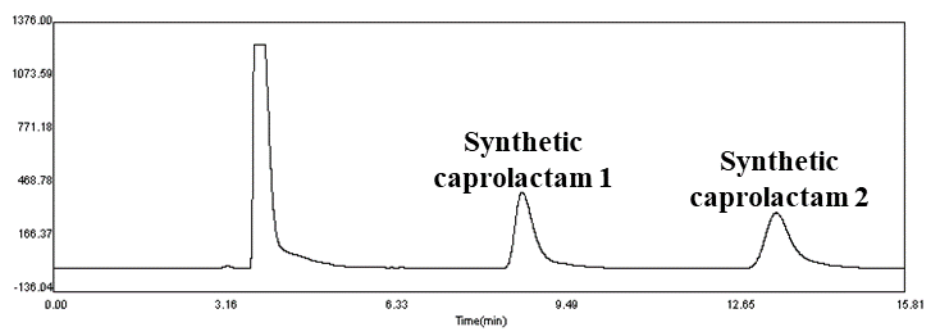

**Figure S8.**  $^1\text{H}$  NMR spectrum (250 MHz) of **2** (a synthetic caprolactam **1**) in  $\text{CDCl}_3$

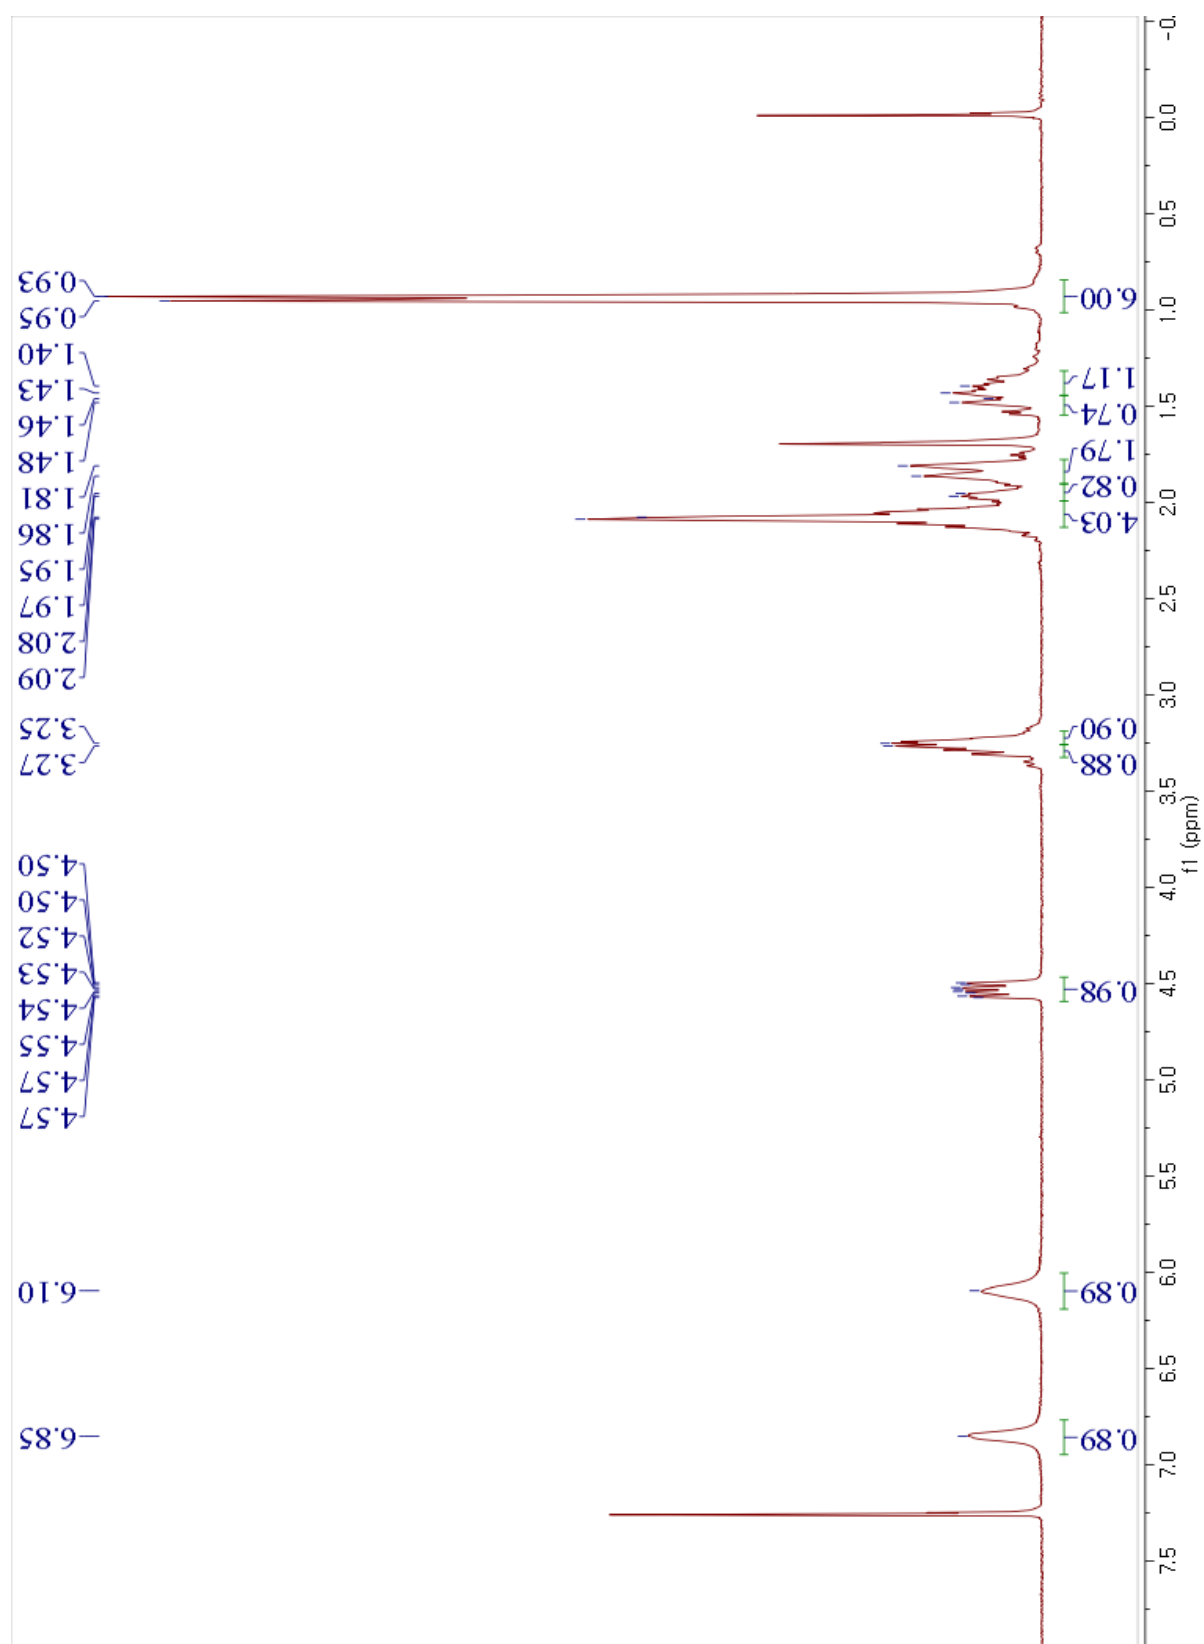

**Figure S9.**  $^{13}\text{C}$  NMR spectrum (63 MHz) of **2** in  $\text{CDCl}_3$

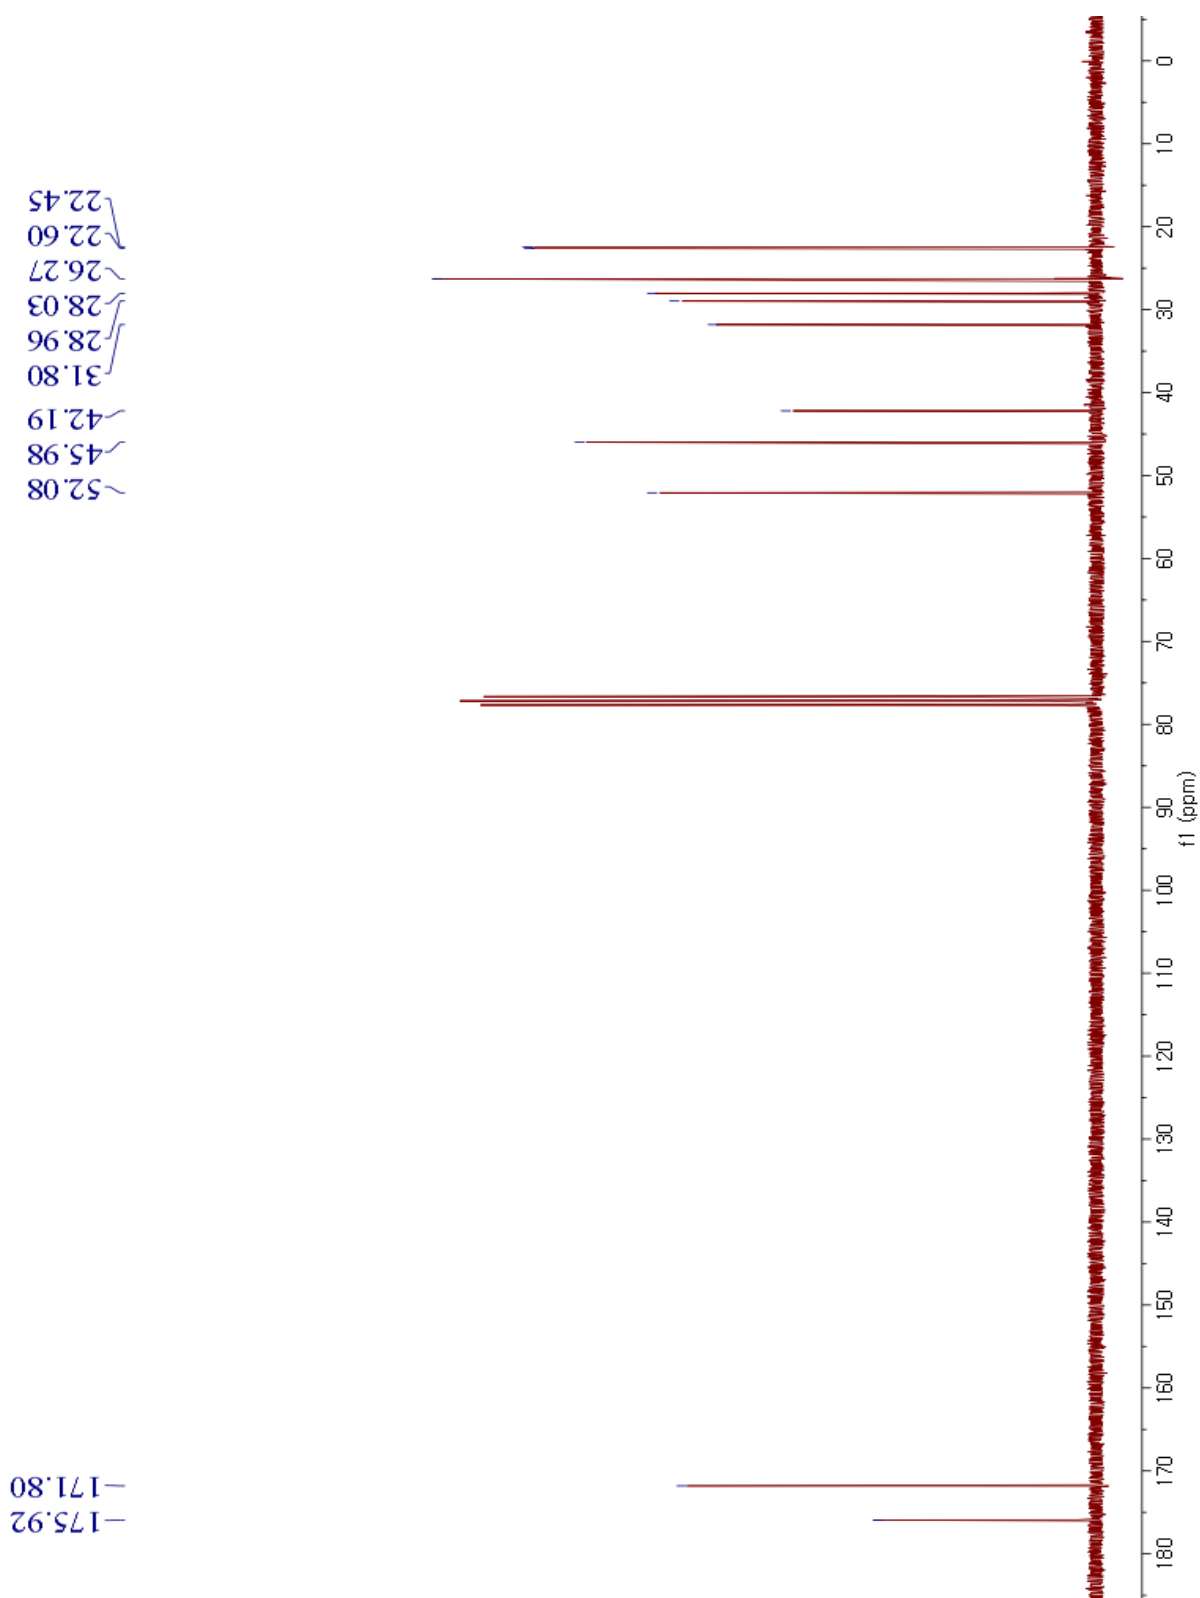

**Figure S10.** Comparison of  $^1\text{H}$  NMR spectra of **1** (natural), **1** (synthetic) and **2** (synthetic)

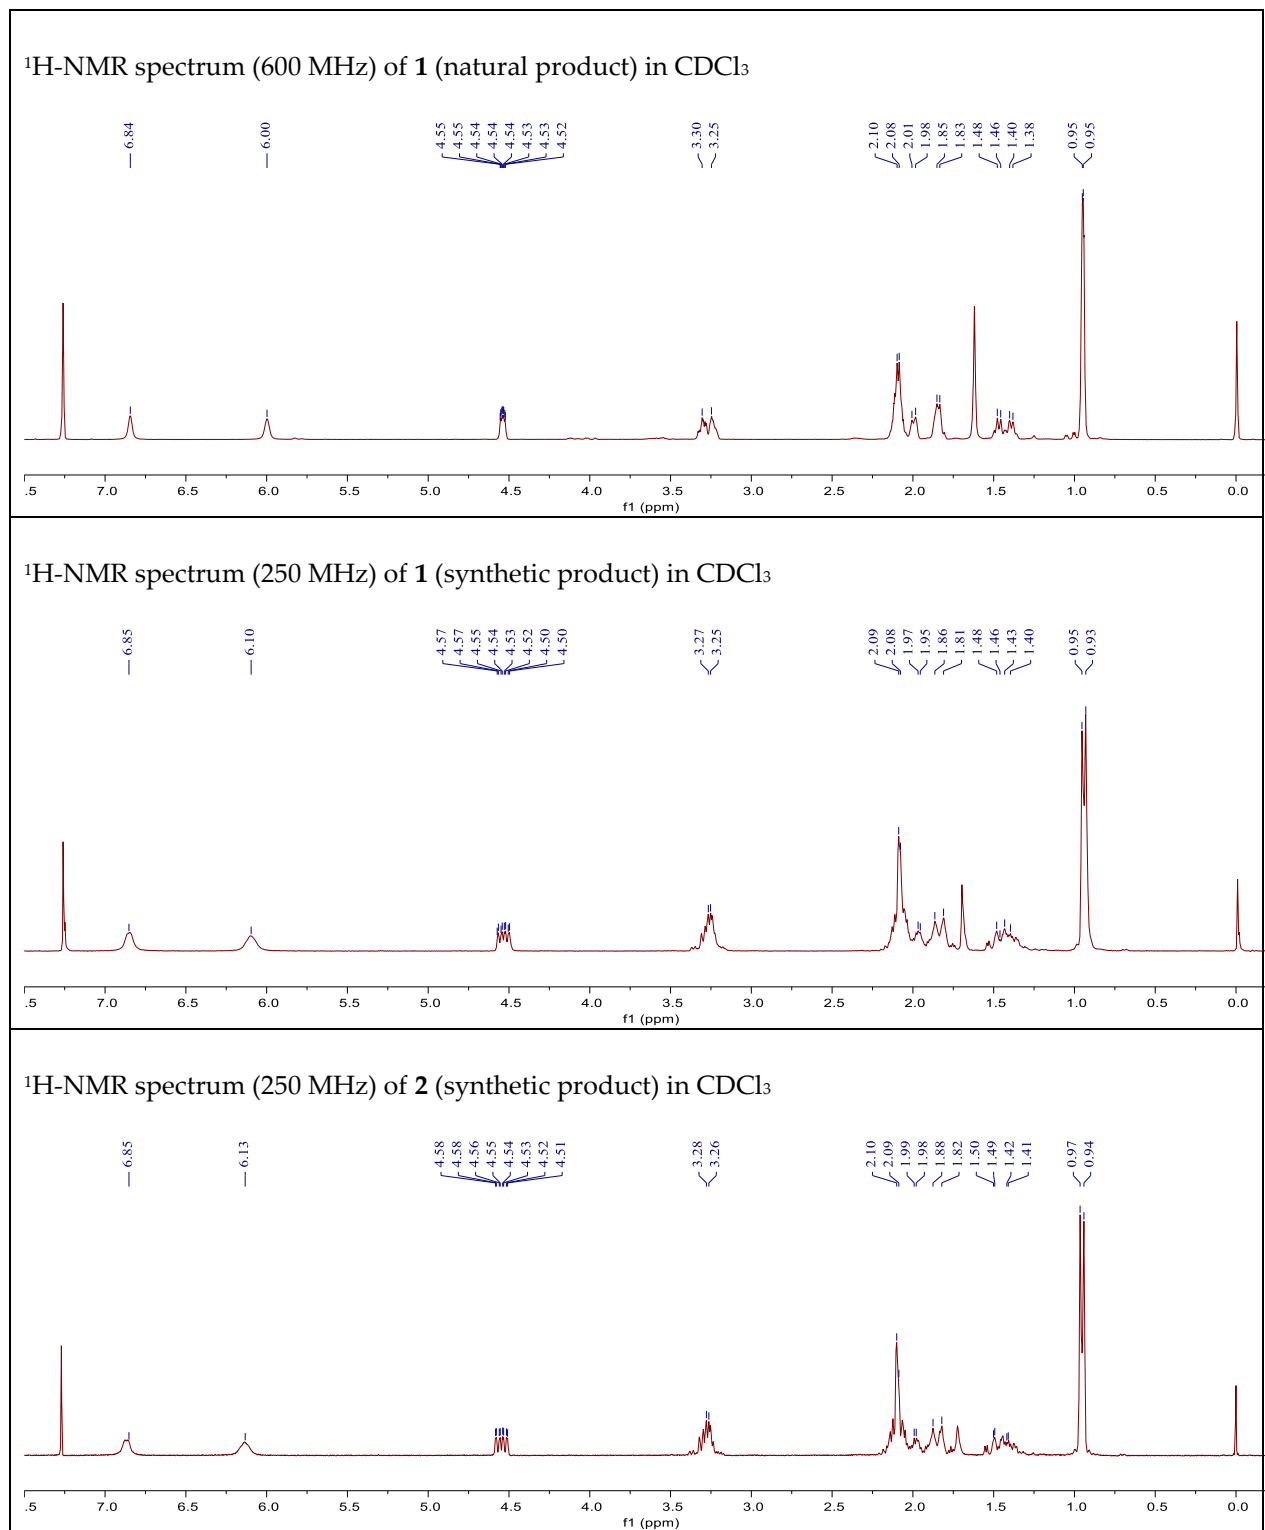

Supplement: s1 [file s1]
